# Supplementary material
Source: PubMed Central journal article supplement (PMC3427011)
Supplement: NIHMS47665-supplement-1.pdf [file NIHMS47665-supplement-1.pdf]

## Channel properties reveal differential expression of TARPed and TARPlless AMPARs in *stargazer* neurons

Cécile Bats, David Soto, Dorota Studniarczyk, Mark Farrant and Stuart G. Cull-Candy

Department of Neuroscience, Physiology and Pharmacology  
University College London, Gower Street, London WC1E 6BT U.K.

### Figures

- 1 **Supplementary Fig. 1:** Properties of homomeric GluA3 CP-AMPARs determined from macroscopic responses and single-channel currents. . . . . 2
- 2 **Supplementary Fig. 2:** Glutamate-evoked whole-cell currents from control and *stg/stg* stellate cells. . . . . 3

### Tables

- 1 **Supplementary Table 1:** Basic properties of EPSCs in control and *stg/stg* stellate cells . . . . . 4
- 2 **Supplementary Table 2:** Properties of synaptic and extrasynaptic AMPARs in control and *stg/stg* stellate cells . . . . . 5
- 3 **Supplementary Table 3:** Single-channel conductance of recombinant homomeric GluA3 AMPARs from non-stationary fluctuation analysis and measurement of directly-resolved channel events . . . . . 6

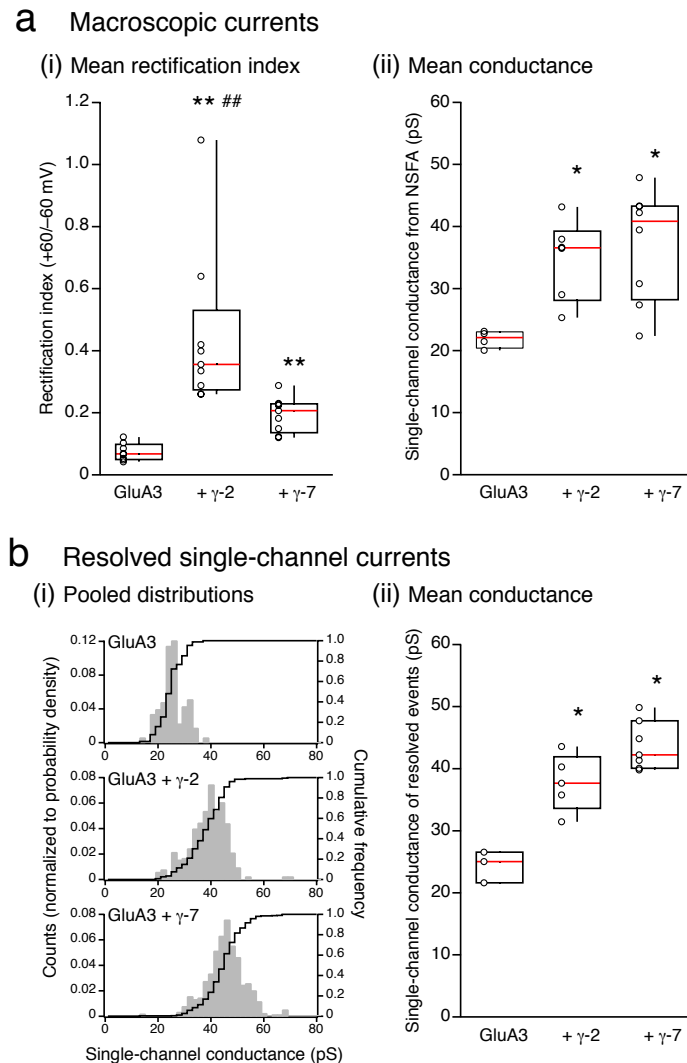

**Supplementary Fig. 1: Properties of homomeric GluA3 CP-AMPA receptors determined from macroscopic responses and single-channel currents.**

(a) Macroscopic responses to 10 mM glutamate recorded in outside-out patches from tsA201 cells were used to determine (i) the rectification index (+60/−60 mV), and (ii) weighted-mean single-channel conductance (from NSFA). (b) Measurements from resolved single-channel currents in the tail of macroscopic responses: (i) Pooled distributions of channel conductance determined from all-point amplitude histograms of selected events (see **Fig. 6**), (ii) Co-expression with  $\gamma$ -2 and  $\gamma$ -7 increased mean single-channel conductance. Group comparisons were performed using a Kruskal-Wallis rank-sum test followed by pair-wise Wilcoxon rank-sum tests with Holm's sequential Bonferroni correction. Asterisks denote statistical significance compared to GluA3 alone (\* $P$ <0.05, \*\* $P$ <0.001); ## indicates significant difference from  $\gamma$ -7 ( $P$ <0.001).

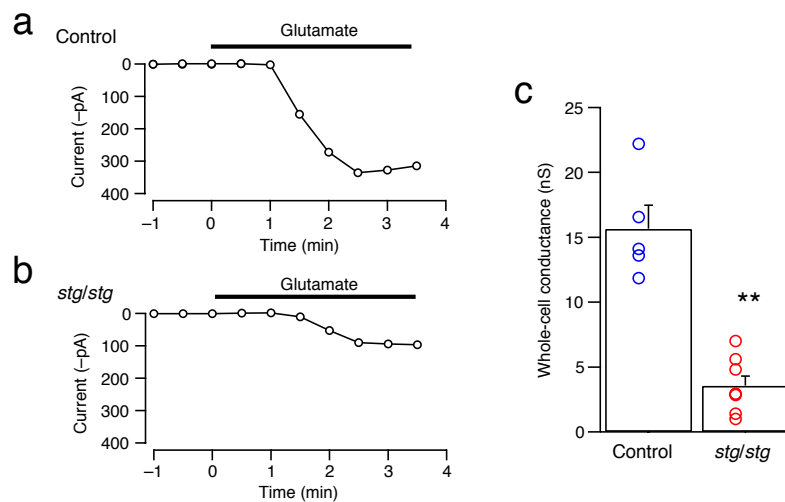

**Supplementary Fig. 2: Glutamate-evoked whole-cell currents from control and *stg/stg* stellate cells.**

(a) Time course of response to bath-applied glutamate (100  $\mu$ M) in the presence of CTZ (100  $\mu$ M) and D-AP5 (20  $\mu$ M) in a representative control stellate cell ( $-20$  mV). (b) Time course of glutamate-evoked current in a representative *stg/stg* stellate cell. (c) Pooled data showing the reduced whole-cell conductance in *stg/stg* stellate cells ( $n = 5$  control cells from 2 animals and 8 *stg/stg* cells from 3 animals; \*\*  $P < 0.01$ ).

|                                    | Control            | <i>stg/stg</i>       | <i>P</i> |
|------------------------------------|--------------------|----------------------|----------|
| <b>eEPSC (acute slice)</b>         |                    |                      |          |
| $RI_{(+40/-60)}$                   | 0.39 ± 0.07 (9)    | 0.17 ± 0.02 (8) *    | 0.0061   |
| <b>qEPSC (acute slice)</b>         |                    |                      |          |
| Amplitude at -80 mV (-pA)          | 44.8 ± 2.7 (17)    | 22.6 ± 1.0 (15) ***  | 5.9e-6   |
| Amplitude <i>CV</i>                | 0.39 ± 0.07 (17)   | 0.27 ± 0.02 (15) *** | 3.4e-6   |
| 10-90% Rise time ( $\mu$ s)        | 173 ± 9 (18)       | 196 ± 8 (8) *        | 0.026    |
| $\tau_{w, decay}$ (ms)             | 0.92 ± 0.06 (18)   | 0.86 ± 0.07 (8) n.s. | 0.72     |
| Peak conductance (-80 mV; pS)      | 623.4 ± 52.0 (6)   | 285.9 ± 11.9 (5) **  | 0.0081   |
| Peak conductance (+60 mV; pS)      | 405.3 ± 40.4 (6) † | 234.8 ± 13.5 (5) ¶ * | 0.014    |
| $RI_{(+60/-80)}$ (count matched)   | 0.66 ± 0.02 (6)    | 0.79 ± 0.07 (5) n.s. | 0.12     |
| $RI_{(+60/-80)}$                   | 0.35 ± 0.08 (6)    | 0.09 ± 0.03 (5) **   | 0.0043   |
| Frequency (+60/-80 mV)             | 0.58 ± 0.07 (6)    | 0.14 ± 0.03 (5) **   | 0.0081   |
| Single-channel conductance (pS)    | 30.6 ± 3.7 (18)    | 16.1 ± 1.1 (8) **    | 0.0017   |
| $N_p$                              | 24.9 ± 3.6 (18)    | 19.9 ± 1.5 (8) n.s.  | 0.66     |
| <b>mEPSC (dissociated culture)</b> |                    |                      |          |
| $RI_{(+60/-80)}$                   | 1.14 ± 0.30 (5)    | 0.47 ± 0.10 (9) ***  | 0.001    |

**Supplementary Table 1: Basic properties of EPSCs in control and *stg/stg* stellate cells.**

Data are presented as mean ± s.e.m. (from *n* cells). Statistical significance was determined using the non-parametric Wilcoxon rank sum test (unpaired). Asterisks denote significance: \*  $P < 0.05$ , \*\*  $P < 0.01$ , \*\*\*  $P < 0.001$ . Paired comparisons were made using the Wilcoxon signed rank test: †  $P = 0.036$  versus -80 mV, ¶  $P = 0.059$  versus -80 mV. Note, as synaptic channel conductance was determined in the presence of strontium (see **Methods**), the absolute conductance value should not be compared directly with previously published values obtained in solutions containing calcium. Recordings from tsA201 cells showed that the weighted-mean single-channel conductance (determined by NSFA) was reduced by approximately 20% in strontium for both GluA1 and GluA1/2 combinations (data not shown).

|                                                   | Control          | <i>stg/stg</i>        | <i>P</i> |
|---------------------------------------------------|------------------|-----------------------|----------|
| <b>qEPSC PhTX-433 block</b>                       |                  |                       |          |
| (PhTX/control, -80 mV)                            |                  |                       |          |
| Charge (per PF stim.)                             | 0.57 ± 0.08 (5)  | 0.22 ± 0.05 (6) *     | 0.022    |
| Amplitude                                         | 0.79 ± 0.08 (5)  | 0.85 ± 0.02 (6) n.s.  | 0.17     |
| Frequency                                         | 0.75 ± 0.11 (5)  | 0.26 ± 0.05 (6) *     | 0.0081   |
| <b>Excised somatic patches</b>                    |                  |                       |          |
| $\tau_{w, des}$ (ms)                              | 3.07 ± 0.43 (11) | 2.49 ± 0.28 (8) n.s.  | 0.48     |
| Steady-state (% peak)                             | 2.97 ± 0.76 (9)  | 2.87 ± 0.69 (10) n.s. | 0.91     |
| $RI_{(+60/-60)}$                                  | 0.41 ± 0.06 (9)  | 0.25 ± 0.02 (10) *    | 0.02     |
| Channel conductance (NSFA) (pS)                   | 27.5 ± 1.2 (9)   | 26.2 ± 3.2 (8) n.s.   | 0.47     |
| Channel conductance (Resolved <sup>†</sup> ) (pS) | 35.2 ± 1.8 (8)   | 31.6 ± 2.2 (7) n.s.   | 0.40     |

**Supplementary Table 2: Properties of synaptic and extrasynaptic AMPARs in control and *stg/stg* stellate cells.** Data are presented as mean ± s.e.m. (from *n* cells). Statistical significance was determined using the non-parametric Wilcoxon rank sum test (unpaired). Asterisks denote significance: \* *P* < 0.05. †Note, direct measurement of single-channel current amplitudes was performed in a subset of recordings (8 out of 9 control and 7 out of 8 *stg/stg* cells).

| Single-channel conductance (pS) |            |            |          |          |
|---------------------------------|------------|------------|----------|----------|
|                                 | NSFA       | Resolved   | <i>n</i> | <i>P</i> |
| GluA3                           | 22.4 ± 0.5 | 24.4 ± 1.5 | 3        | 0.500    |
| GluA3 + $\gamma$ -2             | 36.6 ± 2.3 | 37.8 ± 2.1 | 5        | 0.625    |
| GluA3 + $\gamma$ -7             | 38.5 ± 3.3 | 43.7 ± 1.5 | 7        | 0.578    |

**Supplementary Table 3: Single-channel conductance of recombinant homomeric GluA3 AMPARs from non-stationary fluctuation analysis and measurement of directly-resolved channel events.** Data are presented as mean ± s.e.m. (from *n* outside-out patches from tsA201 cells), and represent weighted mean single-channel conductance from NSFA of macroscopic responses, and measurements from multiple all-point amplitude histograms of selected events in the tail of the same macroscopic currents. Paired comparisons were made using the Wilcoxon signed rank test.
